# Supplementary material for: Myxoma Virus Optimizes Cisplatin for the Treatment of Ovarian Cancer In Vitro and in a Syngeneic Murine Dissemination Model
Source: PubMed Central journal article supplement — Mol Ther Oncolytics. 2017 Aug 9;6:90–9. doi: 10.1016/j.omto.2017.08.002 (PMC5573804; doi:10.1016/j.omto.2017.08.002), 2017-08-09

**OMTO, Volume 6**

**Supplemental Information**

**Myxoma Virus Optimizes Cisplatin  
for the Treatment of Ovarian Cancer In Vitro  
and in a Syngeneic Murine Dissemination Model**

**Bernice Nounamo, Jason Liem, Martin Cannon, and Jia Liu**

## Supplemental Figure legends

**Supplemental Figure 1. MYXV complements chemotherapy in a replication-independent manner against primary OC tumor cells.** A. MYXV complements cisplatin for improved cytotoxicity. Primary patient ascites-derived OvCa-2a tumor cells were mock-treated or infected with MYXV (wt or *M062R*-null MYXV) at an moi of 10; cisplatin treatment at 5  $\mu$ M followed by infection, or cisplatin was given before viral infection. The first treatment (virus or chemotherapy) lasted 48 h, followed by 24 h of growth in fresh medium; cells were then treated with a second treatment (chemotherapy or virus) for another 48 h before cell viability was measured by MTT assay similarly as shown in Figure 3. B. MYXV complements gemcitabine -associated cytotoxicity. The primary OvCa-26 OC cell line was used in this study to test combinatorial effect with gemcitabine at a dose of 10  $\mu$ M. The study was conducted similarly to that is described above.

**Supplemental Figure 2. Single-agent MYXV used to treat ID8 disseminated tumor-bearing mice at late time point significantly prolongs survival.** Mice injected with  $6 \times 10^6$  tumor cells were treated with corresponding therapy as shown at 16 days post-tumor injection. Kaplan-Meier survival curve is shown along with the treatment schedule. Statistical analysis was carried out with the log-rank (Mantel-Cox) test ( $p < 0.0001$ ) and the Gehan-Breslow-Wilcoxon test ( $p < 0.0001$ ). The median survival time of each treatment group is as following: PBS (n=5) 65 days; Gemcitabine (n=8) 78; Cisplatin (n=8) 90; vMyxGFP (wt) (n=8) 101.5; vMyxM062RKO (n=8) 102.5. \* $p < 0.05$  and \*\*\* $p < 0.0001$ .

Supplemental Figure 1.

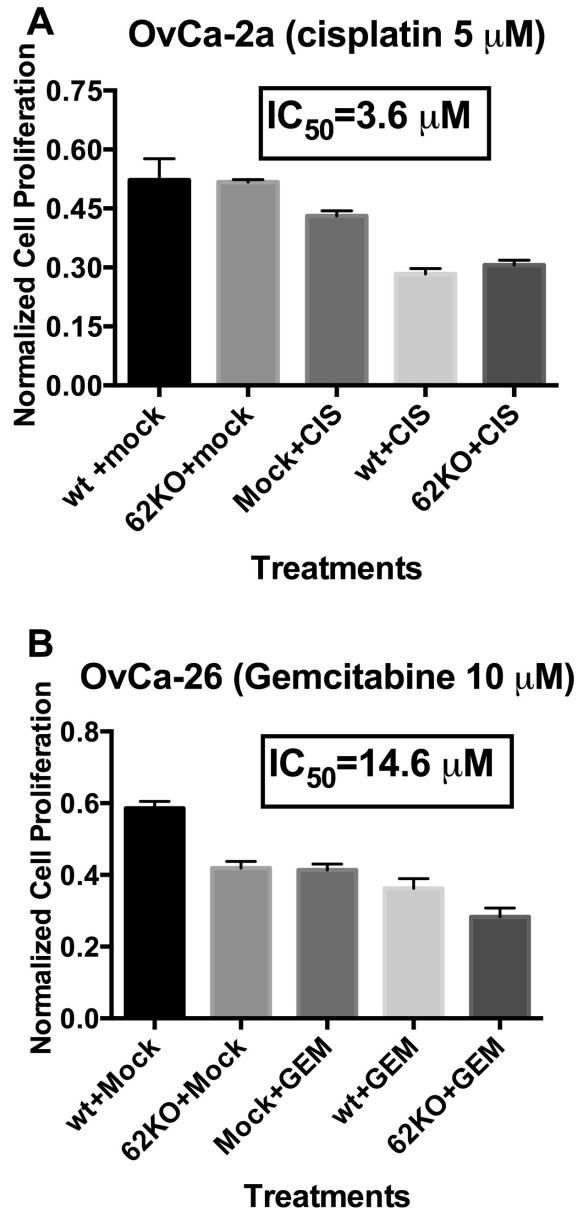

Supplemental Figure 2.

## Treatment Schedule

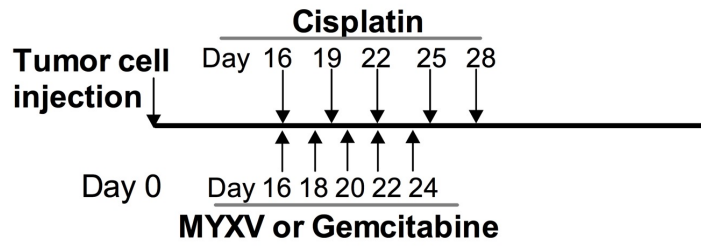

## Syngeneic ID8 OC model of Peritoneal Carcinomatosis

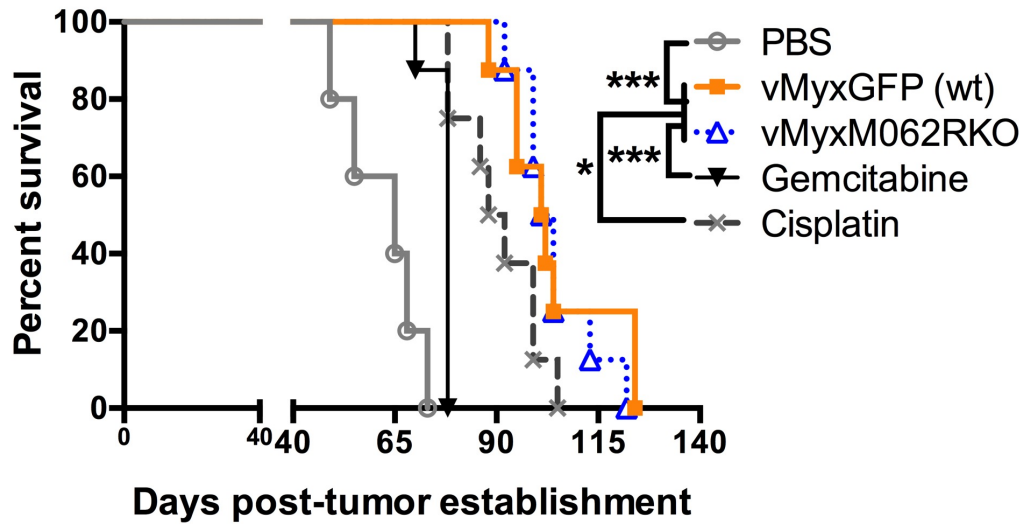

Supplement: mmc1.pdf [file mmc1.pdf]
